# Supplementary material for: Selective and sensitive turn-on chemosensor for Al(iii) ions applicable in living organisms: nanomolar detection in aqueous medium
Source: Royal Society of Chemistry journal article supplement (doi:10.1039/c5ra13478a), 2015-01-01
Supplement: c5ra13478a1.pdf [file c5ra13478a1.pdf]

## *Supporting Information*

### **Highly selective and sensitive turn-on chemosensor for Al(III) ion at the nanomolar level in aqueous media and living organism**

*Siddhartha Pal,<sup>a</sup> Buddhadeb Sen,<sup>a</sup> Manjira Mukherjee,<sup>a</sup> Mousumi Patra,<sup>b</sup> Susmita Lahiri (Ganguly)<sup>c</sup> and Pabitra Chattopadhyay<sup>a\*</sup>*

<sup>a</sup>*Department of Chemistry, Burdwan University, Golapbag, Burdwan-713104, West Bengal, India, E-mail: [pabitracc@yahoo.com](mailto:pabitracc@yahoo.com)*

<sup>b</sup>*Department of Biochemistry and Biophysics, University of Kalyani, Kalyani-741235, West Bengal, India.*

<sup>c</sup>*International Centre for Ecological Engineering (ICEE), University of Kalyani, Kalyani, Nadia-741235, West Bengal, India*

Corresponding author: [pabitracc@yahoo.com](mailto:pabitracc@yahoo.com)

## Contents

**Fig. S1** ESI-MS of the probe (**L**) in acetonitrile

**Fig. S2** FTIR spectrum of **L**

**Fig. S3**  $^1\text{H}$  NMR of the probe (**L**) in  $\text{DMSO-d}_6$

**Fig. S4** Partial  $^{13}\text{C}$  NMR titration with  $\text{Al(III)}$  ions. [(B) **L** and (A) **L** :  $\text{Al(III)}$  (1:2)]

**Fig. S5** ESI-MS of  $\text{Al(III)}$  complex by  $\text{Al(NO}_3)_3$  salt in acetonitrile

**Fig. S6**  $^1\text{H}$  NMR of the **L**- $\text{Al}$  complex in  $\text{DMSO-d}_6$

**Fig. S7** Crystal packing arrangement of **L**

**Fig. S8** Partial  $^1\text{H}$  NMR titration with  $\text{Al(III)}$  ions. [(A) **L** and (B) **L** :  $\text{Al(III)}$  (1:2)]

**Fig. S9** Binding constant ( $K$ ) value  $3.33 \times 10^8 \text{ M}^{-2}$  determined from the interactions of **L** with  $\text{Al(III)}$  ions in HEPES buffer (1 mM, pH 7.4; acetonitrile/water: 1/5, v/v) at  $25^\circ\text{C}$

**Fig. S10** Fluorescence intensity assay of **L** in presence of different metal ions in HEPES buffer (1 mM, pH 7.4; acetonitrile/water: 1/3, v/v) at  $25^\circ\text{C}$  ( $\lambda_{\text{ex}} = 555 \text{ nm}$ )

**Fig. S11** Change of relative fluorescence intensity profile of **L** in HEPES buffer (1 mM, pH 7.4; acetonitrile/water: 1/3, v/v) at  $25^\circ\text{C}$  ( $\lambda_{\text{ex}} = 555 \text{ nm}$ )

**Fig. S12** pH Effect of **L** in absence and in presence of  $\text{Al(III)}$  ions

**Fig. S13** (A) Represents the visual and (B) fluorescence color change without (left) and with (right) addition of **L** (50  $\mu\text{L}$ ) for the qualitative detection of aluminum in tea leaves

**Fig. S14** (A) represents % cell viability of A549 cells treated with different concentrations (1  $\mu\text{M}$ -50  $\mu\text{M}$ ) of **L** for 6 hrs determined by MTT assay

**Table S1** Crystal data and details of refinements for **L**

**Table S2** Selected bond length and bond angles for **L**

**Table S3** Life time detail of **L** at 586 nm (Nano-LED of 550 nm as the light source)

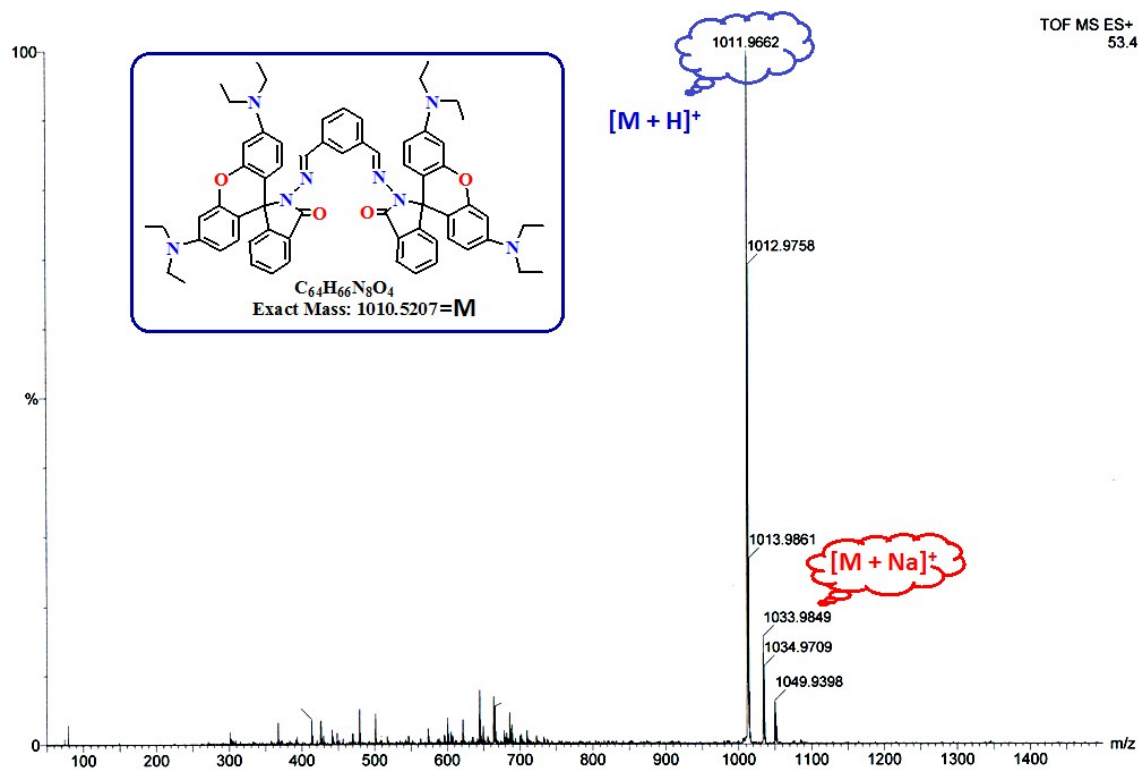

Fig. S1 ESI-MS of the probe (L) in acetonitrile

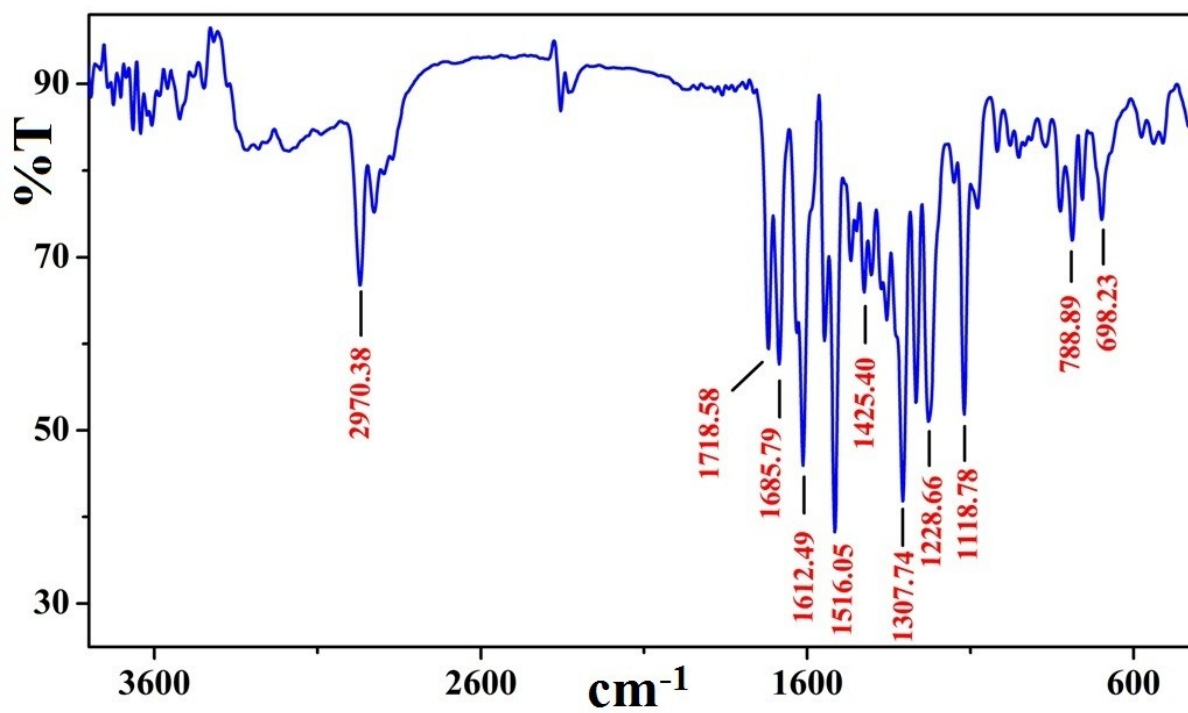

Fig. S2 FTIR spectrum of L

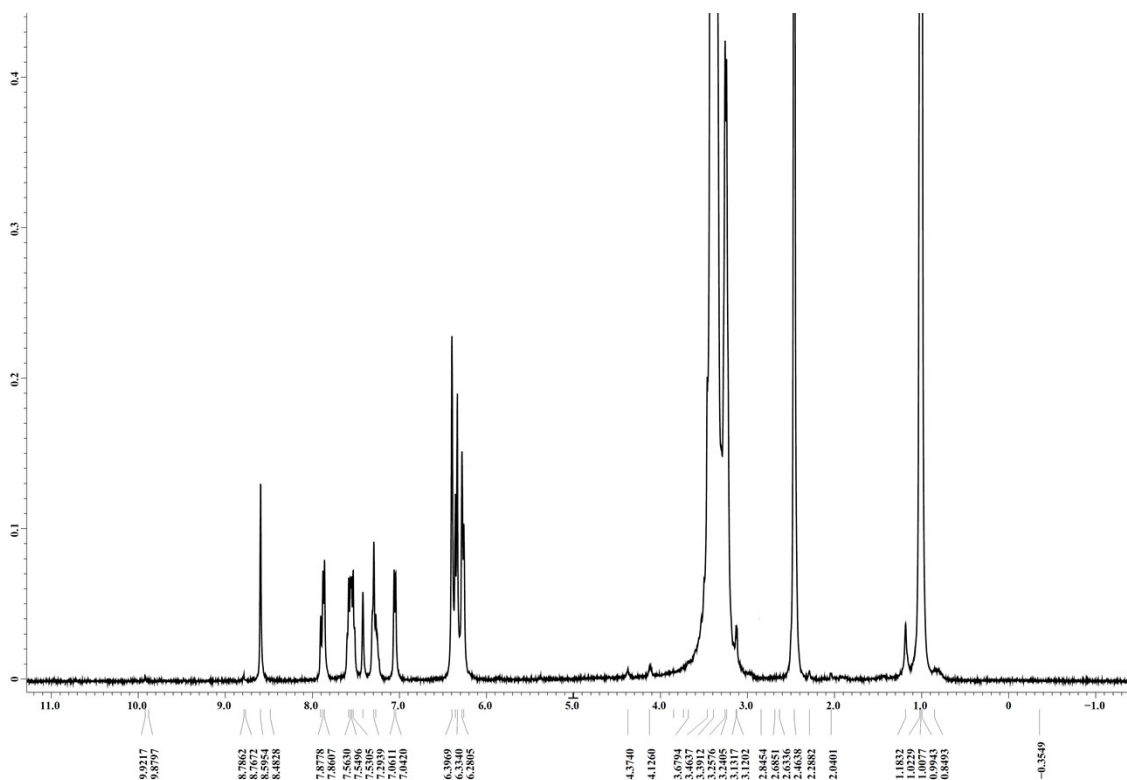

**Fig. S3**  $^1\text{H}$  NMR of the probe (L) in  $\text{DMSO-d}_6$

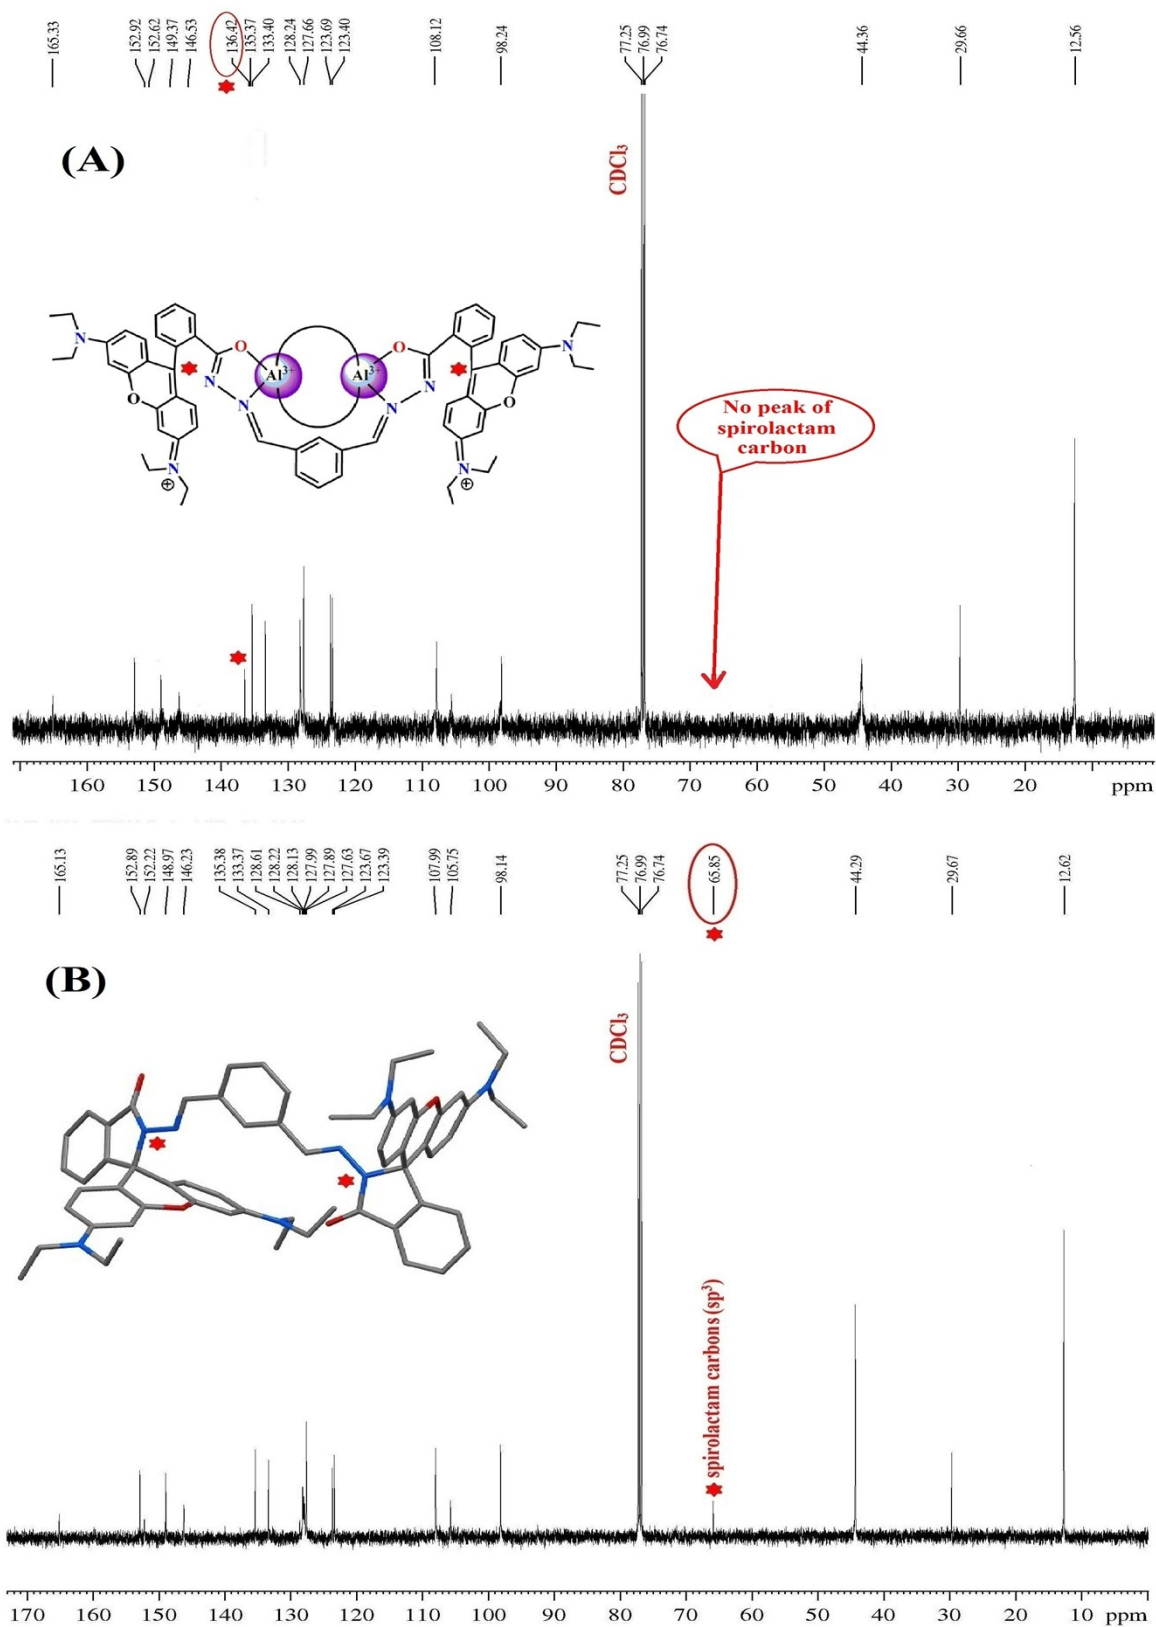

**Fig. S4** Partial  $^{13}\text{C}$ NMR titration with Al(III) ions. [(B) L and (A) L : Al(III) (1:2)]

I.I.C.B.KOLKATA  
11-Mar-2015

12:30:13  
TOF MS ES+  
8.30e3

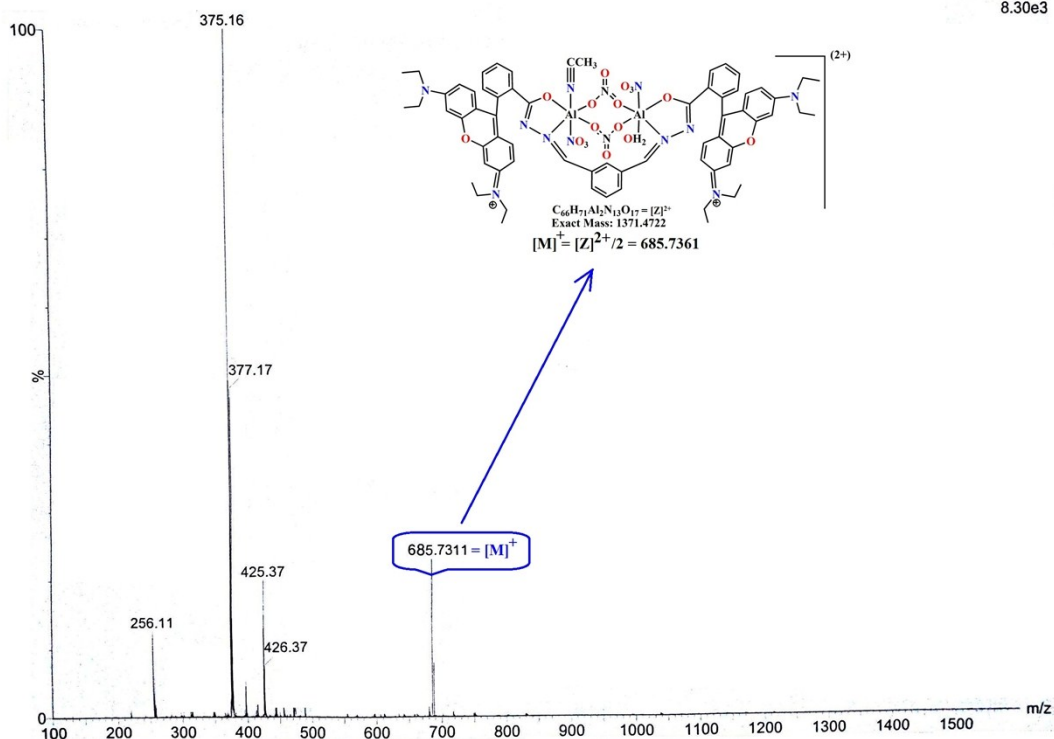

Fig. S5 ESI-MS of Al(III) complex by  $Al(NO_3)_3$  salt in acetonitrile

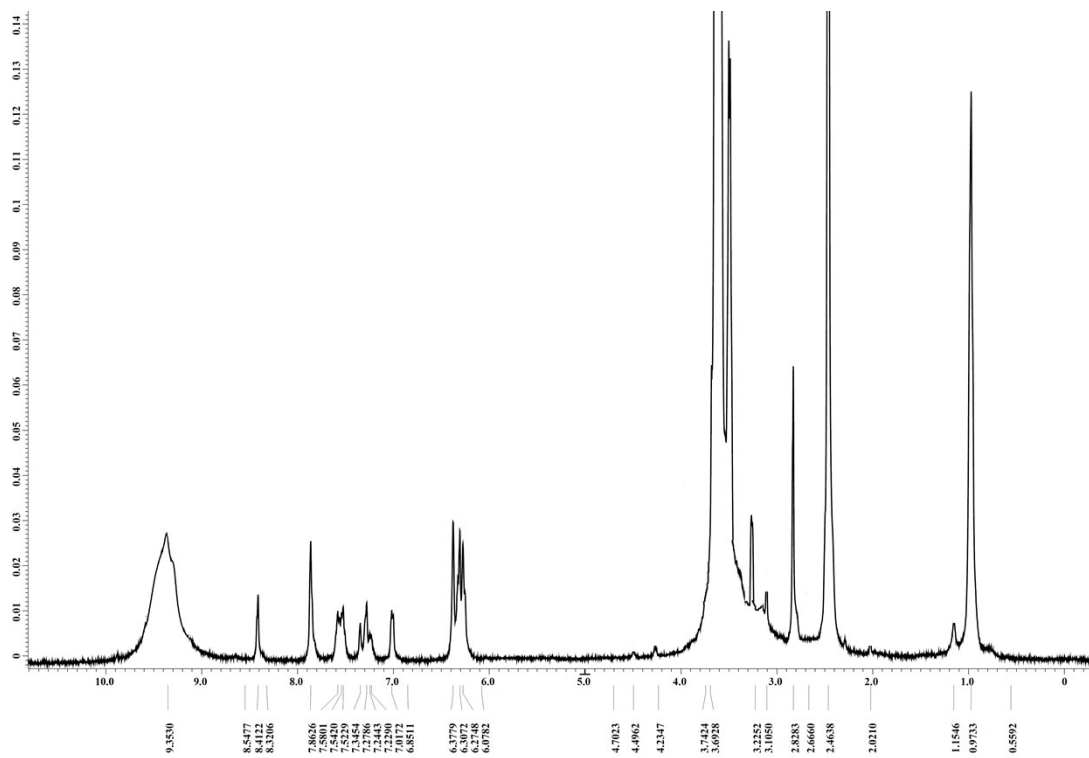

Fig. S6  $^1H$  NMR of the L-Al complex in  $DMSO-d_6$

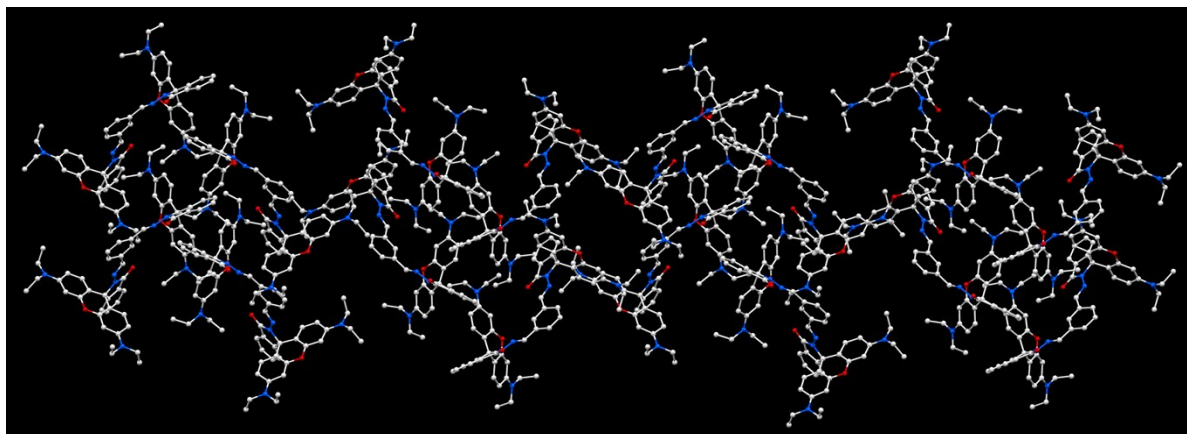

Fig. S7 Crystal packing arrangement of L

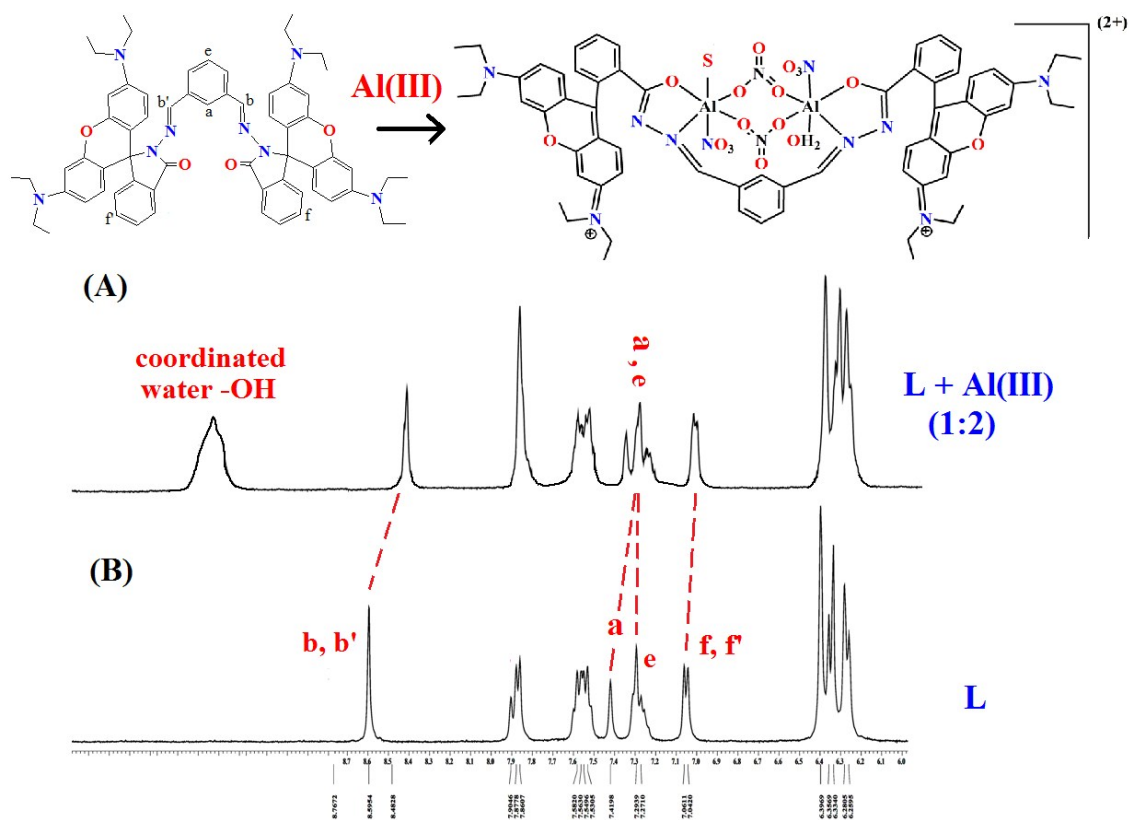

Fig. S8 Partial  $^1\text{H}$  NMR titration with  $\text{Al(III)}$  ions. [(B) L and (A) L :  $\text{Al(III)}$  (1:2)]

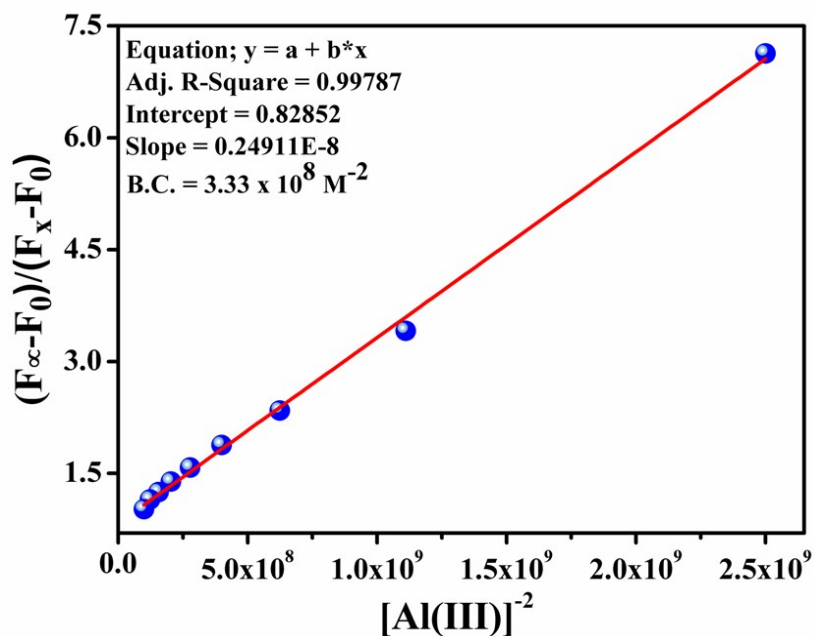

**Fig. S9** Binding constant (K) value  $3.33 \times 10^8 \text{ M}^{-2}$  determined from the interactions of **L** with Al(III) ions in HEPES buffer (1 mM, pH 7.4; acetonitrile/water: 1/3, v/v) at 25 °C

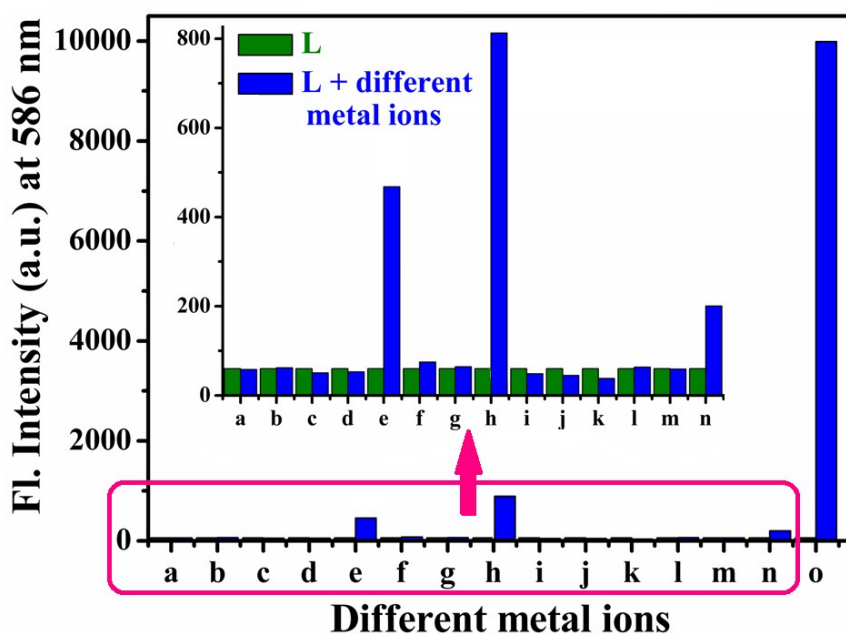

**Fig. S10** Fluorescence intensity assay of **L** in presence of different metal ions in HEPES buffer (1 mM, pH 7.4; acetonitrile/water: 1/3, v/v) at 25 °C ( $\lambda_{\text{ex}} = 555 \text{ nm}$ ), (a)  $\text{Na}^+$ , (b)  $\text{K}^+$ , (c)  $\text{Ca}^{2+}$ , (d)  $\text{Mg}^{2+}$ , (e)  $\text{Cu}^{2+}$ , (f)  $\text{Cr}^{3+}$ , (g)  $\text{Mn}^{2+}$ , (h)  $\text{Fe}^{3+}$ , (i)  $\text{Co}^{2+}$ , (j)  $\text{Ni}^{2+}$ , (k)  $\text{Pb}^{2+}$ , (l)  $\text{Zn}^{2+}$ , (m)  $\text{Cd}^{2+}$ , (n)  $\text{Hg}^{2+}$  and (o)  $\text{Al}^{3+}$



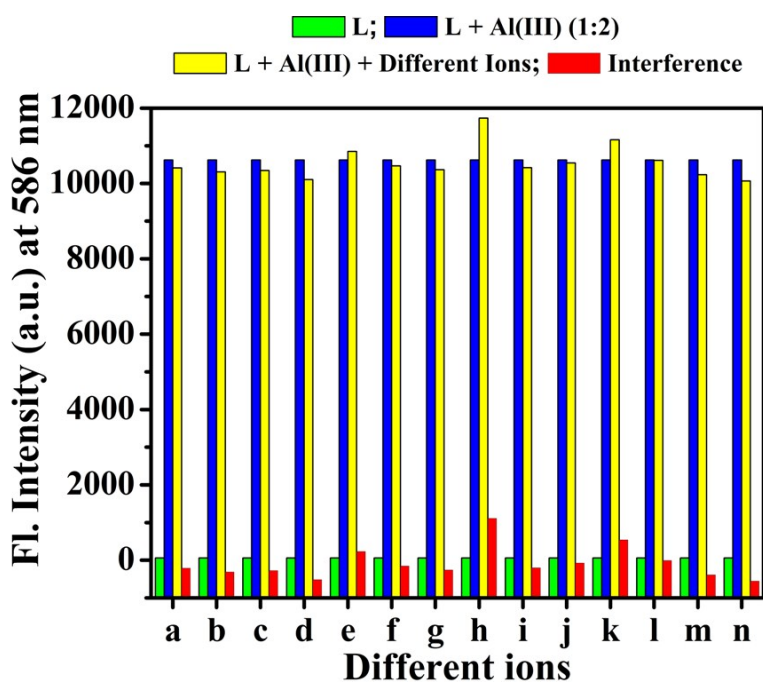

**Fig. S11** Change of relative fluorescence intensity profile of L in HEPES buffer (1 mM, pH 7.4; acetonitrile/water: 1/3, v/v) at 25 °C ( $\lambda_{\text{ex}} = 555 \text{ nm}$ ). (a)  $\text{Na}^+$ , (b)  $\text{K}^+$ , (c)  $\text{Ca}^{2+}$ , (d)  $\text{Mg}^{2+}$ , (e)  $\text{Hg}^{2+}$ , (f)  $\text{Cr}^{3+}$ , (g)  $\text{Mn}^{2+}$ , (h)  $\text{Fe}^{3+}$ , (i)  $\text{Co}^{2+}$ , (j)  $\text{Ni}^{2+}$ , (k)  $\text{Cu}^{2+}$ , (l)  $\text{Zn}^{2+}$ , (m)  $\text{Cd}^{2+}$ , and (n)  $\text{Pb}^{2+}$

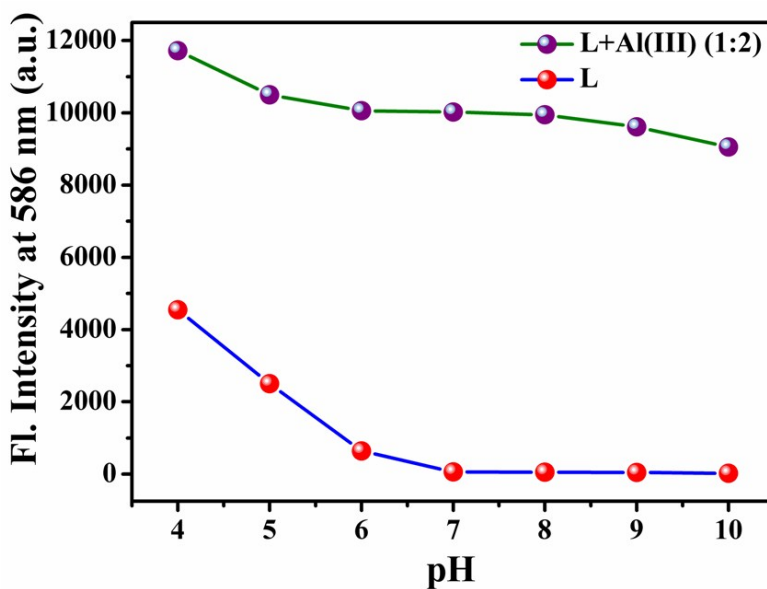

**Fig. S12** pH Effect of L in absence and in presence of Al(III) ions

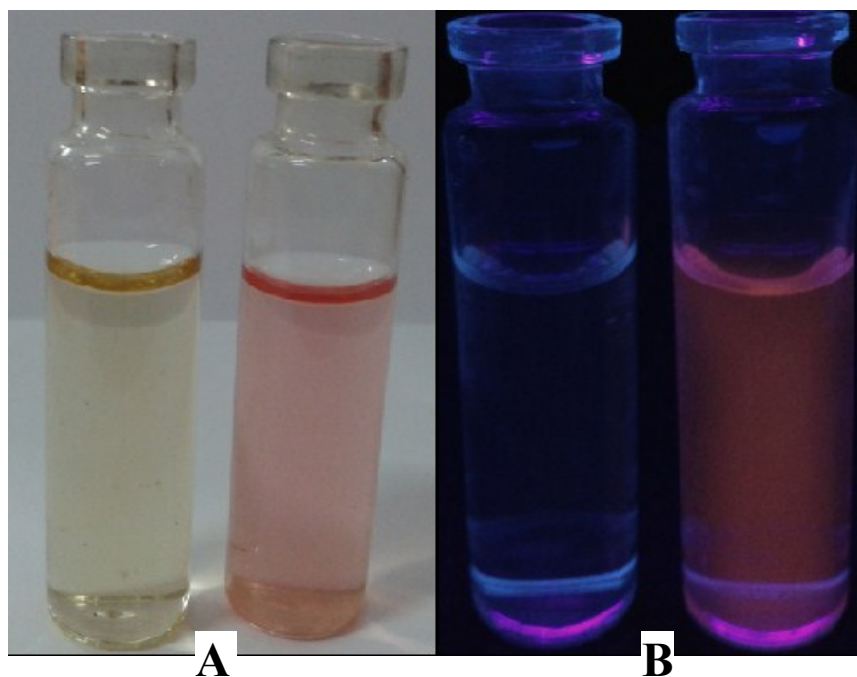

**Fig. S13** (A) Represents the visual and (B) fluorescence color change without (left) and with (right) addition of **L** (50  $\mu$ L) for the qualitative detection of aluminum in tea leaves

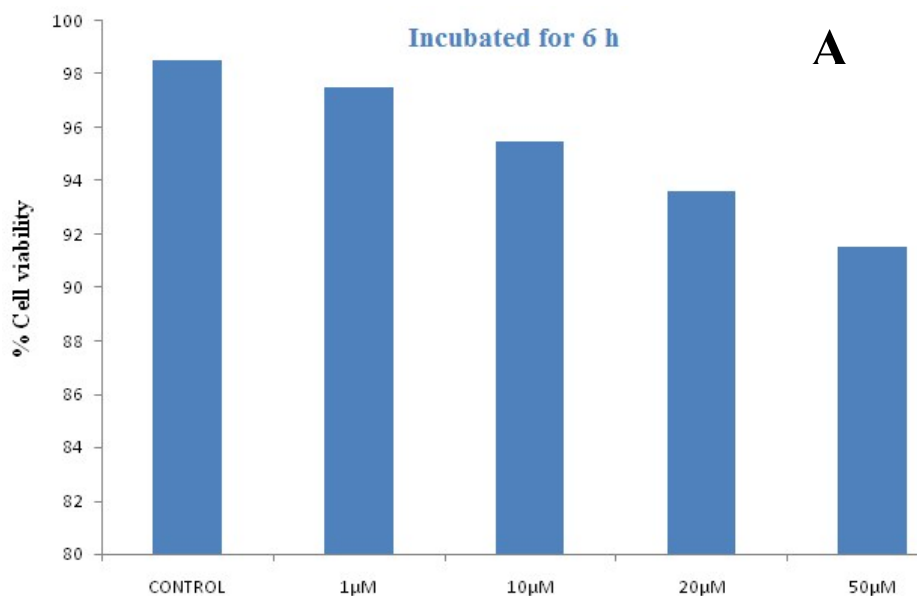

**Fig. S14** (A) represents % cell viability of A549 cells treated with different concentrations (1  $\mu$ M-50  $\mu$ M) of **L** for 6 hrs determined by MTT assay. Results are expressed as mean of three independent experiments.

**Table S1** Crystal data and details of refinements for **L**

| <b>L</b>                                  |                                                               |
|-------------------------------------------|---------------------------------------------------------------|
| Empirical Formula                         | C <sub>64</sub> H <sub>66</sub> N <sub>8</sub> O <sub>4</sub> |
| Formula Weight                            | 1011.24                                                       |
| Crystal system                            | orthorhombic                                                  |
| Space group                               | Fdd2                                                          |
| <i>a</i> (Å)                              | 20.2211(17)                                                   |
| <i>b</i> (Å)                              | 95.380(9)                                                     |
| <i>c</i> (Å)                              | 12.5142(10)                                                   |
| $\alpha$                                  | 90°                                                           |
| $\beta$                                   | 90°                                                           |
| $\gamma$                                  | 90°                                                           |
| Volume (Å <sup>3</sup> )                  | 24136(4)                                                      |
| Temperature (K)                           | 296(2)                                                        |
| <i>Z</i>                                  | 16                                                            |
| $\rho_{\text{calc}}$ (g/cm <sup>3</sup> ) | 1.113                                                         |
| $\mu$ (mm <sup>-1</sup> )                 | 0.071                                                         |
| F(000)                                    | 8608                                                          |
| $\theta$ range (deg)                      | 1.926-25.677                                                  |
| Reflections collected /<br>unique         | 11411/7333                                                    |
| R indices (all data)                      | 0.0677                                                        |
| Goodness-of-fit on $F^2$                  | 1.064                                                         |

**Table S2A** Selected bond distances (Å) for **L**

| <b>L</b> |           |
|----------|-----------|
| N1 - C5  | 1.379(7)  |
| N1 - C2  | 1.449(8)  |
| N1 - C3  | 1.468(9)  |
| N2 - C15 | 1.371(7)  |
| N2 - C19 | 1.452(8)  |
| N2 - C20 | 1.473(8)  |
| N3 - N4  | 1.383(6)  |
| N3 - C28 | 1.393(7)  |
| N3 - C11 | 1.515(7)  |
| N4 - C29 | 1.276(7)  |
| N5 - C48 | 1.390(8)  |
| N5 - C52 | 1.435(10) |
| N5 - C53 | 1.461(9)  |
| N6 - C58 | 1.392(9)  |
| N6 - C63 | 1.430(13) |
| N6 - C62 | 1.462(11) |

**Table S2B** Selected bond angles (°) for **L**

| <b>L</b>       |          |
|----------------|----------|
| C5 - N1 - C2   | 121.3(5) |
| C5 - N1 - C3   | 122.0(5) |
| C2 - N1 - C3   | 116.6(5) |
| C15 - N2 - C19 | 122.7(5) |
| C15 - N2 - C20 | 122.9(5) |
| C19 - N2 - C20 | 114.5(5) |
| N4 - N3 - C28  | 127.2(4) |
| N4 - N3 - C11  | 114.2(4) |
| C28 - N3 - C11 | 112.5(4) |
| C29 - N4 - N3  | 119.5(5) |
| C48 - N5 - C52 | 121.5(6) |
| C48 - N5 - C53 | 120.1(6) |
| C52 - N5 - C53 | 118.4(6) |

**Table S3** Life time detail of **L** at 586 nm (Nano-LED of 550 nm as the light source)

|                             | B <sub>1</sub> | B <sub>2</sub> | T <sub>1</sub> (ns) | T <sub>2</sub> (ns) | T <sub>av</sub> (ns) | χ <sup>2</sup> | φ     | K <sub>r</sub> | K <sub>nr</sub> |
|-----------------------------|----------------|----------------|---------------------|---------------------|----------------------|----------------|-------|----------------|-----------------|
| <b>L</b>                    | 39.49          | 60.51          | 0.042               | 1.005               | 0.625                | 1.047          | 0.084 | 0.134          | 1.466           |
| <b>L + Al(III)</b><br>(1:2) | 12.06          | 87.94          | 0.575               | 1.274               | 1.189                | 1.005          | 0.75  | 0.631          | 0.20            |
